# Supplementary material
Source: PubMed Central journal article supplement (PMC4856565)
Supplement: NIHMS770012-supplement-Supplemental_Material.pdf [file NIHMS770012-supplement-Supplemental_Material.pdf]

## **SUPPLEMENTAL MATERIAL**

### **In Pulmonary Arterial Hypertension, Reduced BMPR2 Promotes Endothelial-to-Mesenchymal Transition Via HMGA1 and its Target Slug**

Rachel K. Hopper, MD, Jan-Renier A.J. Moonen, MD, PhD, Isabel Diebold, MD,  
Aiqin Cao, PhD, Christopher J. Rhodes, PhD, Nancy F. Tojais, PhD, Jan K. Hennigs, MD,  
Mingxia Gu, Lingli Wang, MD, Marlene Rabinovitch, MD

**Supplemental Table 1: Primers Used**

| <b>Gene (HUMAN)</b> | <b>Primer</b>                                            |
|---------------------|----------------------------------------------------------|
| HMGA1               | F – GCTGGTAGGGAGTCAGAAGGA<br>R - TGGTGGTTTTCCGGGTCTTG    |
| SLUG                | F – CGAACTGGACACACATACAGTG<br>R - CTGAGGATCTCTGGTTGTGGT  |
| SNAIL               | F – TCGGAAGCCTAACTACACAGCGA<br>R - AGATGAGCATTGGCAGCGAG  |
| $\alpha$ SMA        | F – CTATGAGGGCTATGCCTTGCC<br>R - GCTCAGCCAGTAGTAACGAAGGA |
| 1 VE-CADHERIN       | F – TTGGAACCAGATGCACATTGAT<br>R – TCTTGCGACTCACGCTTGAC   |
| CALPONIN            | F – CTGTCAGCCGAGGTTAAGAAC<br>R - GAGGCCGTCCATGAAGTTGTT   |
| BMPR2               | F – CTGCGGCTGCTTCGCAGAAT<br>R - TGGTGTGTGTCAGGAGGTGG     |
| $\beta$ -ACTIN      | F – CATGCCATCCTGCGTCTGGA<br>R - CCGTGGCCATCTCTTGCTCG     |
| <b>Gene (MOUSE)</b> | <b>Primer</b>                                            |
| HMGA1               | F – GGTCGGGAGTCAGAAAGAGC<br>R – ATTCTTGCTTCCCTTTGGTCG    |
| SLUG                | F – CAGCGAACTGGACACACACA<br>R – ATAGGGCTGTATGCTCCCGAG    |
| $\alpha$ SMA        | F – CCCAGACATCAGGGAGTAATGG<br>R – TCTATCGGATACTTCAGCGTCA |
| SM22 $\alpha$       | F – CCAACAAGGGTCCATCCTACG<br>R – ATCTGGGCGGCCTACATCA     |
| BMPR2               | F – TCGCATCTGCCATTTGTCCT<br>R - TAGGAGGCTGCTCTTCGTCT     |
| $\beta$ -ACTIN      | F – ATGTGGATCAGCAAGCAGGA<br>R - AAGGGTGTAACGCAGCTCA      |
